# Supplementary material for: The effect of HIV-associated tuberculosis, tuberculosis-IRIS and prednisone on lung function
Source: PubMed Central journal article supplement (PMC7066470; doi:10.1183/13993003.01692-2019), 2020-03-12
Supplement: ERJ-01692-2019.SUPPLEMENT.pdf [file ERJ-01692-2019.SUPPLEMENT.pdf]

# **The effect of HIV-associated tuberculosis, tuberculosis-IRIS and prednisone on lung function**

Cari Stek, Brian Allwood, Elsa du Bruyn, Jozefien Buyze, Charlotte Schutz, Friedrich Thienemann, Adele Lombard, Robert J. Wilkinson, Graeme Meintjes and Lutgarde Lynen

**Online supplement**

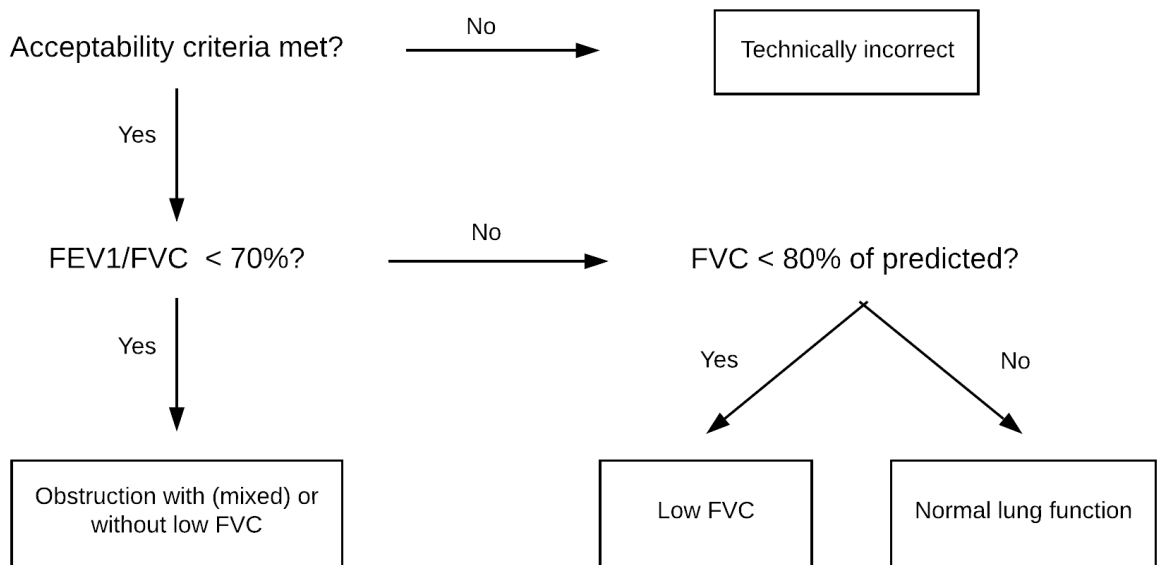

**Figure S1 Definitions of different spirometry outcomes**

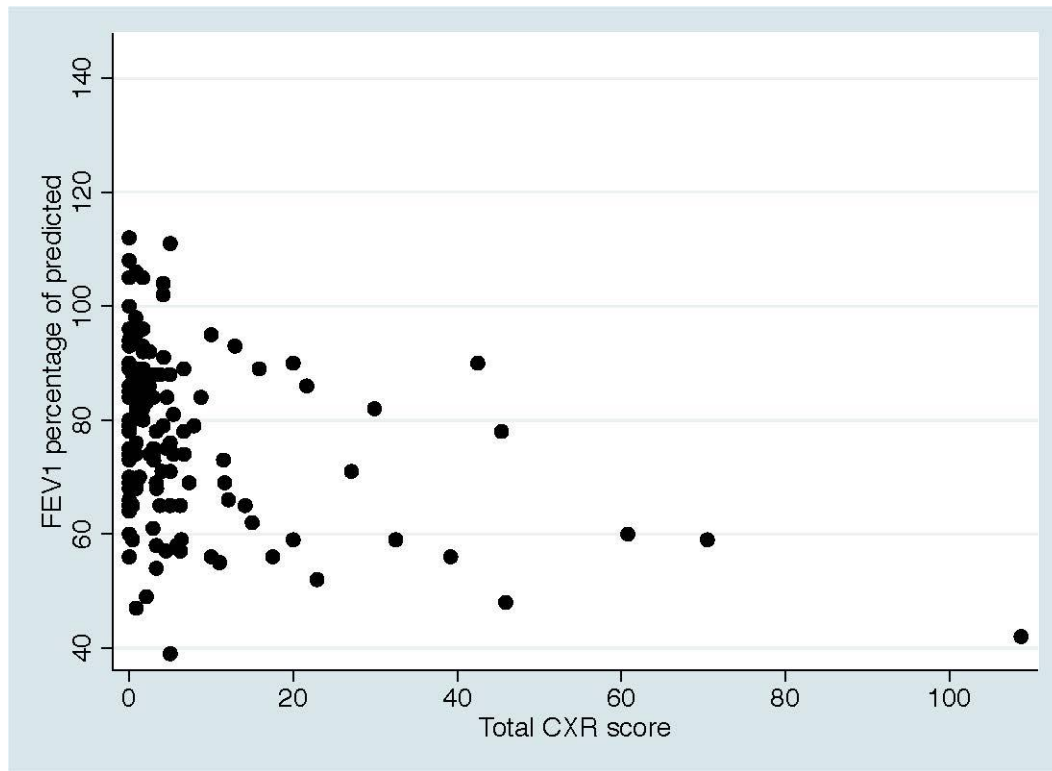

**Figure S2 The association between chest X-ray score and FEV1 percentage of predicted**

(n = 135). Chest X-rays were scored using an adapted version of the Timika score<sup>1)</sup>: visible lung fields on the chest X-ray were divided into six zones and the percentage of affected lung in each zone and its prominent opacification type were estimated. A total score was generated by adding up the percentages of each zone and dividing the total by the number of scored zones (usually 6), adding an additional 40 points if one or more cavities > 1cm in diameter were present. Therefore, total scores could range from 0 to 140. Chest X-ray scores were statistically significantly correlated with FEV1 percentage of predicted ( $p < 0.001$ ).

<sup>1)</sup> Kriel M, Lotz JW, Kidd M, Walzl G. Evaluation of a radiological severity score to predict treatment outcome in adults with pulmonary tuberculosis. *Int J Tuberc Lung Dis* 2015; 19(11): 1354-1360

TABLE S1 Acceptability criteria for the recording of FVC and FEV1 using spirometry

|                     |                                                                                                                                          |
|---------------------|------------------------------------------------------------------------------------------------------------------------------------------|
| <b>No artefacts</b> | Coughing during first second of expiration<br>Glottis closure<br>Early termination or submaximal effort<br>Leak<br>Obstructed mouthpiece |
| <b>Good starts</b>  | Extrapolated volume < 5% of FVC or 0,15l, whichever is greater                                                                           |
| <b>Exhalation</b>   | Duration $\geq$ 6 s, plateau in the volume-time curve, or if the subject cannot or should not continue                                   |

---

Miller MR, Hankinson J, Brusasco V, Burgos F, Casaburi R, Coates A, Crapo R, Enright P, van der Grinten CP, Gustafsson P, Jensen R, Johnson DC, MacIntyre N, McKay R, Navajas D, Pedersen OF, Pellegrino R, Viegi G, Wanger J, Force AET. Standardisation of spirometry. *Eur Respir J* 2005; 26: 319-338

---

TABLE S2 Association between chest X-ray score and respiratory symptoms

|                      | <b>Odds ratio</b> | <b>p-value</b> |
|----------------------|-------------------|----------------|
| Cough                | 1.24              | 0.08           |
| Dyspnoea at exertion | 1.45              | 0.007          |
| Dyspnoea at rest     | 1.03              | 0.89           |
| Total                | 1.51              | 0.006          |

Total = cough, and/or dyspnea at exertion, and/or dyspnea at rest. Odds ratio's are calculated for an increase of 10 units in chest-X-ray score. A p-value of < 0.05 is considered significant.

TABLE S3 The effect of prednisone prophylaxis on change over time of pulmonary function parameters, adjusted for prednisone as treatment

Change over time of six-minute walking distance (6MWD) in meters

|                                                                                                                 | 6MWD                                   | 95% CI        | p-value        |
|-----------------------------------------------------------------------------------------------------------------|----------------------------------------|---------------|----------------|
| <b>Intercept</b><br>(average 6MWD if all other co-variates are 0)                                               | 662                                    | 595 – 729     |                |
|                                                                                                                 | <b>Mean change in 6MWD</b>             | <b>95% CI</b> | <b>p-value</b> |
| Effect of prednisone as treatment                                                                               | -20                                    | -44 - 4       | 0.097          |
| Effect of smoking (ever vs never)                                                                               | -45                                    | -70 - -20     | <0.001         |
| Effect of age (per increase of one year in age at week 0)                                                       | -3                                     | -4 – -1       | <0.001         |
| Effect of gender (female vs male)                                                                               | -108                                   | -133 – -82    | <0.001         |
| Effect of type of TB (participants without signs of extrapulmonary TB vs those with signs of extrapulmonary TB) | 35                                     | -9 – 78       | 0.12           |
| Effect of HIV viral load (per log <sub>10</sub> cps/ml increase at screening)                                   | -1                                     | -2 – -1       | <0.001         |
| Effect of CD4 count (per increase of 10 CD4 cells/μl at screening)                                              | -1                                     | -3 – 2        | 0.48           |
| Effect of previous tuberculosis                                                                                 | -26                                    | -64 – 13      | 0.19           |
|                                                                                                                 | <b>Mean change in 6MWD from week 0</b> | <b>95% CI</b> | <b>p-value</b> |
| <b>Effect of time (visit)</b>                                                                                   |                                        |               | <0.0001        |
| week 4                                                                                                          | -27                                    | -50 – -4      |                |
| week 12                                                                                                         | 34                                     | 13 – 56       |                |
| week 28                                                                                                         | 69                                     | 48 – 91       |                |
| <b>Effect of prophylactic prednisone</b>                                                                        |                                        |               | 0.020          |
| week 4                                                                                                          | 44                                     | 15 – 72       |                |
| week 12                                                                                                         | -0.03                                  | -27 – 27      |                |
| week 28                                                                                                         | 3                                      | -23 – 30      |                |

Change over time of forced expiratory volume in 1 second (FEV1) as % of predicted value

|                                                                                                                 | FEV1 %                       | 95% CI        | p-value        |
|-----------------------------------------------------------------------------------------------------------------|------------------------------|---------------|----------------|
| <b>Intercept</b><br>(average FEV1 % if all other co-variates are 0)                                             | 80.7                         | 65.9 – 95.5   |                |
|                                                                                                                 | <b>Mean change in FEV1 %</b> | <b>95% CI</b> | <b>p-value</b> |
| Effect of prednisone as treatment                                                                               | 1.5                          | -3.7 – 6.8    | 0.57           |
| Effect of smoking (ever vs never)                                                                               | -5.6                         | -10.3 - -0.8  | 0.022          |
| Effect of age (per increase of one year in age at week 0)                                                       | 0.06                         | -0.2 – 0.3    | 0.66           |
| Effect of gender (female vs male)                                                                               | -3.5                         | -8.8 – 1.9    | 0.21           |
| Effect of type of TB (participants without signs of extrapulmonary TB vs those with signs of extrapulmonary TB) | 0.7                          | -8.6 – 10.1   | 0.88           |
| Effect of HIV viral load (per log <sub>10</sub> cps/ml increase at                                              | 0.04                         | -0.1 – 0.2    | 0.64           |

|                                                                          |       |              |       |
|--------------------------------------------------------------------------|-------|--------------|-------|
| screening)                                                               |       |              |       |
| Effect of CD4 count (per increase of 10 CD4 cells/ $\mu$ l at screening) | -0.7  | -1.3 – -0.2  | 0.008 |
| Effect of previous tuberculosis                                          | -14.8 | -23.4 – -6.2 | 0.001 |

|                                          | Mean change in FEV1 % from week 0 | 95% CI     | p-value |
|------------------------------------------|-----------------------------------|------------|---------|
| <b>Effect of time (visit)</b>            |                                   |            | <0.0001 |
| week 4                                   | -1.5                              | -4.8 – 1.8 |         |
| week 12                                  | 2.9                               | -0.3 – 6.1 |         |
| week 28                                  | 6.4                               | 3.1 – 9.6  |         |
| <b>Effect of prophylactic prednisone</b> |                                   |            | 0.043   |
| week 4                                   | 5.1                               | 0.9 – 9.4  |         |
| week 12                                  | -0.04                             | -4.1 – 4.0 |         |
| week 28                                  | -1.0                              | -5.1 – 3.2 |         |

Intercept and estimated coefficients with their 95% confidence intervals (95% CI) from the mixed effects regression models are listed. Data are adjusted for all other covariates presented in the table. We have not adjusted for TB-IRIS because we assume it to be on the causal pathway.

TABLE S4 The effect of baseline spirometry outcome on the effect of prednisone on change over time of forced expiratory volume in 1 second (FEV1) as % of predicted value

|                                                                                                | FEV1 %                                       | 95% CI        |                |
|------------------------------------------------------------------------------------------------|----------------------------------------------|---------------|----------------|
| <b>Intercept</b><br>(average FEV1 % at week 0 for non-smokers with abnormal spirometry result) | 67.1                                         | 63.4 - 70.8   | <0.001         |
|                                                                                                | <b>Mean change in FEV1 %</b>                 | <b>95% CI</b> | <b>p-value</b> |
| Effect of spirometry outcome at baseline (normal vs abnormal)                                  | 25.6                                         | 20.2 - 31.0   | <0.001         |
| Effect of smoking (ever vs never)                                                              | -2.0                                         | -6.0 - 2.0    | 0.33           |
|                                                                                                | <b>Mean change in FEV1 %<br/>from week 0</b> | <b>95% CI</b> | <b>p-value</b> |
| <b>Effect of time (visit)</b>                                                                  |                                              |               | <0.0001        |
| week 4                                                                                         | -0.3                                         | -4.5 - 3.8    |                |
| week 12                                                                                        | 4.3                                          | 0.4 - 8.2     |                |
| week 28                                                                                        | 9.8                                          | 5.6 - 14.0    |                |
| <b>Effect of prophylactic prednisone</b>                                                       |                                              |               | 0.12           |
| week 4                                                                                         | 5.9                                          | 0.7 - 11.2    |                |
| week 12                                                                                        | 0.8                                          | -4.5 - 6.0    |                |
| week 28                                                                                        | -0.4                                         | -6.1 - 5.3    |                |
| <b>Effect of normal spirometry at baseline</b>                                                 |                                              |               | 0.41           |
| week 4                                                                                         | -0.4                                         | -7.6 - 6.7    |                |
| week 12                                                                                        | -3.0                                         | -10.5 - 4.5   |                |
| week 28                                                                                        | -6.7                                         | -15.0 - 1.6   |                |
| <b>Effect of normal spirometry at baseline on the effect of prophylactic prednisone</b>        |                                              |               | 0.56           |
| week 4                                                                                         | -5.3                                         | -14.2 - 3.6   |                |
| week 12                                                                                        | -5.7                                         | -15.0 - 3.7   |                |
| week 28                                                                                        | -3.3                                         | -13.6 - 7.1   |                |

Intercept and estimated coefficients with their 95% confidence intervals (95% CI) from the mixed effects regression models are listed. Data are adjusted for all other covariates presented in the table. Because allocation to either the prednisone or the placebo arm was randomized, no adjustment for baseline variables other than smoking and baseline spirometry outcome was done. Only participants with who had a baseline spirometry test done (n = 83) were included in this analysis.



TABLE S5 The effect of prednisone prophylaxis on change over time of forced vital capacity (FVC) as % of predicted value

|                                                               | FVC %                               | 95% CI      |         |
|---------------------------------------------------------------|-------------------------------------|-------------|---------|
| <b>Intercept</b><br>(average FVC % at week 0 for non-smokers) | 77.3                                | 74.4 – 80.3 |         |
|                                                               | Mean change in FVC %                | 95% CI      | p-value |
| <b>Effect of smoking (ever vs never)</b>                      | -5.0                                | -8.7 – -1.2 | 0.009   |
|                                                               | Mean change in FVC %<br>from week 0 | 95% CI      | p-value |
| <b>Effect of time (visit)</b>                                 |                                     |             | <0.0001 |
| week 4                                                        | -0.8                                | -3.7 – 2.0  |         |
| week 12                                                       | 4.3                                 | 1.6 – 7.0   |         |
| week 28                                                       | 7.3                                 | 4.5 – 10.1  |         |
| <b>Effect of prophylactic prednisone</b>                      |                                     |             | 0.015   |
| week 4                                                        | 4.9                                 | 1.3 – 8.5   |         |
| week 12                                                       | -0.1                                | -3.5 – 3.4  |         |
| week 28                                                       | -0.8                                | -4.4 – 2.7  |         |

Intercept and estimated coefficients with their 95% confidence intervals (95% CI) from the mixed effects regression models are listed. Data are adjusted for all other covariates presented in the table.

TABLE S6 The effect of tuberculosis-associated immune reconstitution inflammatory syndrome (TB-IRIS) on change over time of forced vital capacity (FVC) as % of predicted value

|                                                                                                                 | FVC %                                   | 95% CI        | p-value        |
|-----------------------------------------------------------------------------------------------------------------|-----------------------------------------|---------------|----------------|
| <b>Intercept</b><br>(average FVC % if all other co-variables are 0)                                             | 80.3                                    | 55.7 – 104.8  | <0.001         |
|                                                                                                                 | <b>Mean change in FVC %</b>             | <b>95% CI</b> | <b>p-value</b> |
| Effect of TB-IRIS at week 0                                                                                     | 2.9                                     | -2.6 – 8.3    | 0.30           |
| Effect of smoking (ever vs never)                                                                               | -5.9                                    | -10.1 – -1.6  | 0.007          |
| Effect of age (per increase of one year in age at week 0)                                                       | 0.1                                     | -0.2 – 0.4    | 0.45           |
| Effect of gender (female vs male)                                                                               | -2.7                                    | -7.8 – 2.3    | 0.29           |
| Effect of type of TB (participants without signs of extrapulmonary TB vs those with signs of extrapulmonary TB) | 3.7                                     | -5.0 – 12.5   | 0.40           |
| Effect of HIV viral load (per log <sub>10</sub> cps/ml increase at screening)                                   | -1.0                                    | -4.6 – 2.7    | 0.61           |
| Effect of CD4 count (per increase of 10 CD4 cells/μl at screening)                                              | -0.7                                    | -1.2 – -0.2   | 0.009          |
| Effect of previous tuberculosis                                                                                 | -10.6                                   | -18.7 – -2.6  | 0.010          |
|                                                                                                                 | <b>Mean change in FVC % from week 0</b> | <b>95% CI</b> | <b>p-value</b> |
| <b>Effect of time (visit)</b>                                                                                   |                                         |               | <0.0001        |
| week 4                                                                                                          | 1.7                                     | -2.0 – 5.5    |                |
| week 12                                                                                                         | 7.5                                     | 3.9 – 11.0    |                |
| week 28                                                                                                         | 8.7                                     | 5.0 – 12.3    |                |
| <b>Effect of TB-IRIS</b>                                                                                        |                                         |               | 0.026          |
| week 4                                                                                                          | -4.4                                    | -8.5 – -0.4   |                |
| week 12                                                                                                         | -5.7                                    | -9.7 – -1.8   |                |
| week 28                                                                                                         | -2.5                                    | -6.7 – 1.7    |                |
| <b>Effect of prophylactic prednisone</b>                                                                        |                                         |               | 0.040          |
| week 4                                                                                                          | 4.5                                     | 0.7 – 8.2     |                |
| week 12                                                                                                         | -0.4                                    | -4.0 – 3.1    |                |
| week 28                                                                                                         | -0.8                                    | -4.4 – 2.9    |                |

Intercept and estimated coefficients with their 95% confidence intervals (95% CI) from the mixed effects regression models are listed. Data are adjusted for all other covariates presented in the table
